# Supplementary material for: Unusually Situated Binding Sites for Bacterial Transcription Factors Can Have Hidden Functionality
Source: PLOS journal article supplement (doi:10.1371/journal.pone.0157016), 2016-06-03
Supplement: S1 (10.1371/journal.pone.0157016.s001) [file journal.pone.0157016.s001]

**Figure S1**

**A**

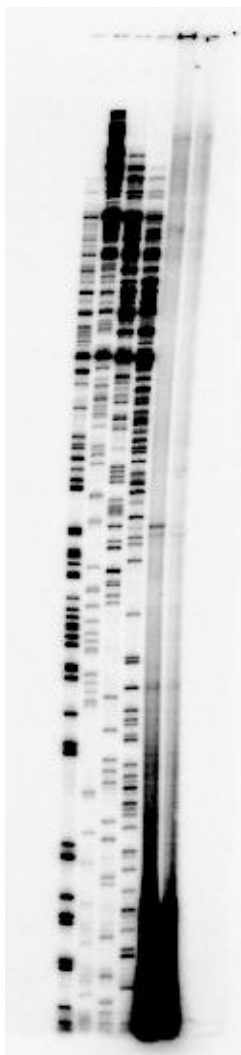

**B**

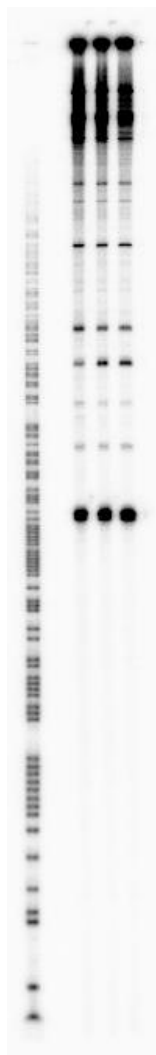

**C**

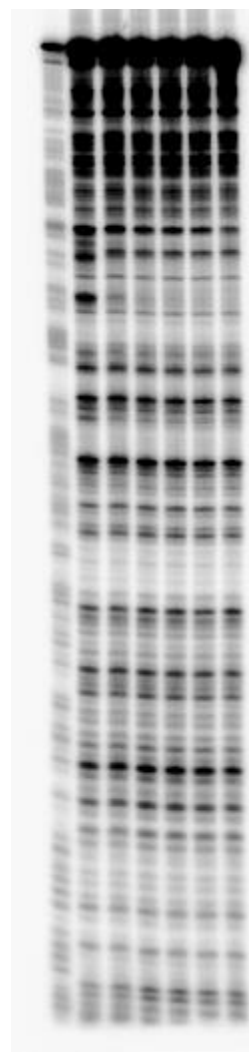

**Figure S1: Raw gel images.** Panels A-C show raw gel images from Figures 2A, 2C and 3 respectively.
